# Supplementary material for: The Effects of Brackish Irrigation on Soil Ion Accumulation and Growth of Atriplex Species
Source: MDPI journal article supplement (doi:10.3390/soilsystems7040084), 2023-10-09
Supplement: s1 [file s1]

## Supplementary Materials

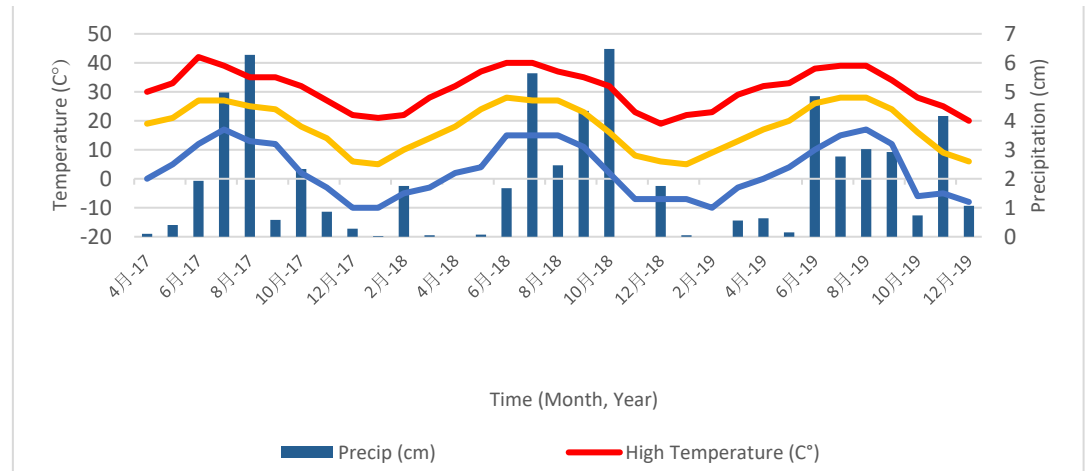

**Figure S1.** Weather data through the study months showing high monthly temperature, low monthly temperature, average monthly temperature, and precipitation.

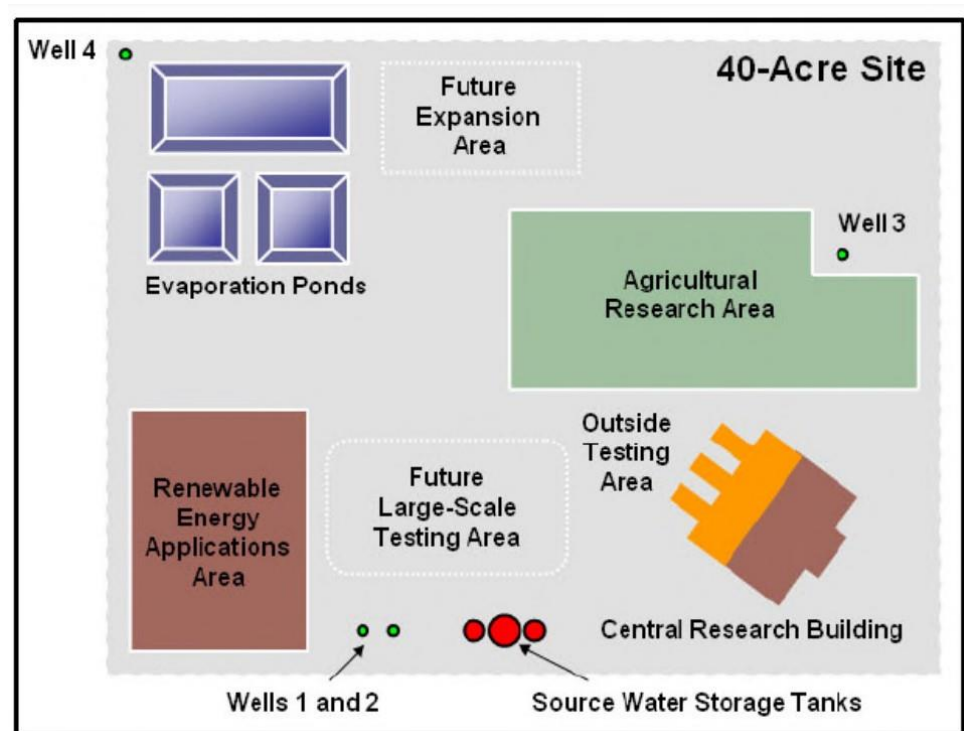

(A.)

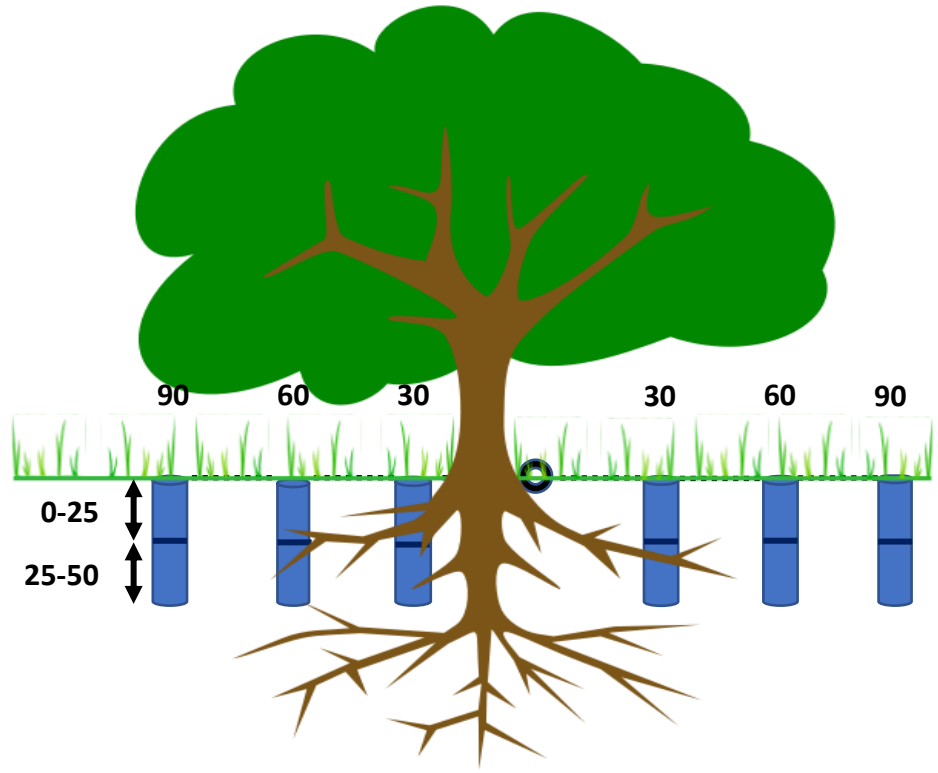

(B.)

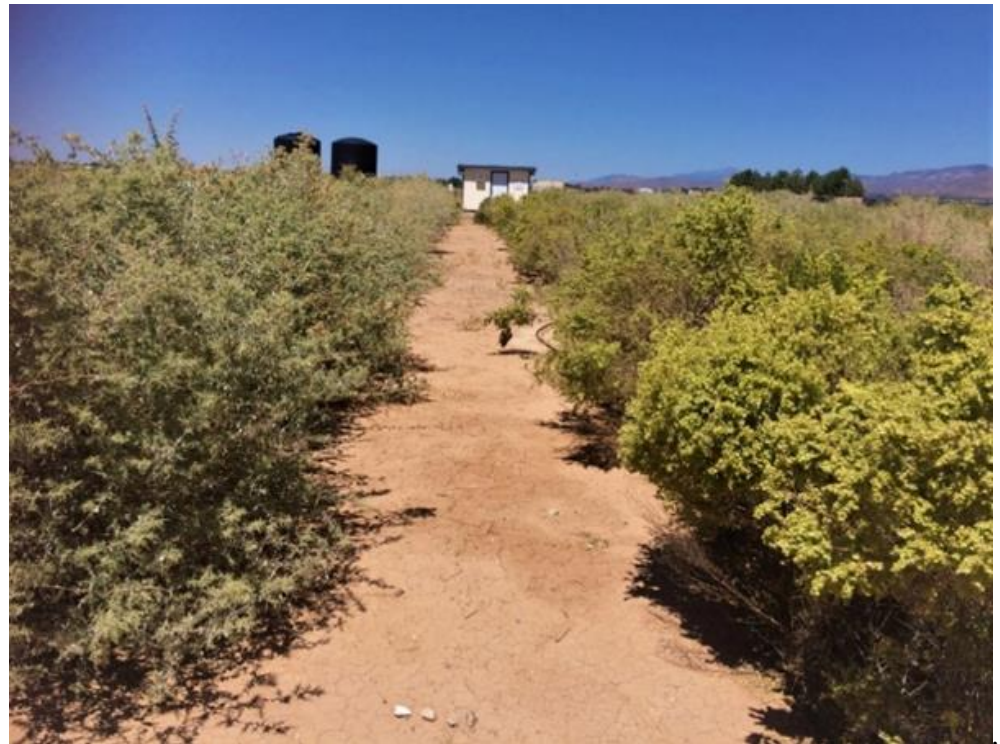

(C.)

**Figure S2. (A.)** Location of agriculture research area, wells and other facilities in Brackish Ground-water National Desalination Research Facility. Obtained from BGNDRF [30]. **(B.)** Schematic to show location of irrigation emitter (oval shaped) and locations of soil sampling. Samples were collected 30 cm, 60 cm, and 90 cm on either side of the drip emitter and at 2 depths, 0-25 cm, and 25-50 cm **(C.)** Atriplex agriculture plot, BGNDRF, August 2019. Atriplex lentiformis on the left, Atriplex canescens on the right.

**Table S1.** Soil texture data. Samples shown by distance from plant (30, 60, 90 cm) and depth (a=0-25 cm, b=25-50 cm)

| Distance. | Depth | %Sand | %Clay | %Silt | Texture         |
|-----------|-------|-------|-------|-------|-----------------|
| 30        | A     | 59.3  | 24.0  | 16.7  | Loam            |
| 30        | A     | 37.3  | 50.0  | 12.7  | silty loam      |
| 30        | A     | 57.3  | 30.3  | 12.4  | clay loam       |
| 30        | B     | 63.3  | 22.0  | 14.7  | sandy clay loam |
| 30        | B     | 63.3  | 22.3  | 14.4  | sandy clay loam |
| 30        | B     | 67.6  | 6.7   | 25.6  | sandy loam      |
| 60        | A     | 51.3  | 36.0  | 12.7  | clay loam       |
| 60        | A     | 59.3  | 32.3  | 8.4   | clay loam       |
| 60        | A     | 56.0  | 32.0  | 12.0  | clay loam       |
| 60        | B     | 33.3  | 48.3  | 18.4  | silty clay      |
| 60        | B     | 49.3  | 38.3  | 12.4  | clay loam       |
| 60        | B     | 60.0  | 24.0  | 16.0  | Loam            |
| 90        | A     | 39.3  | 49.4  | 11.3  | Clay            |
| 90        | A     | 53.6  | 30.0  | 16.4  | clay loam       |
| 90        | B     | 39.3  | 46.3  | 14.4  | Clay            |
| 90        | B     | 47.6  | 38.0  | 13.4  | clay loam       |

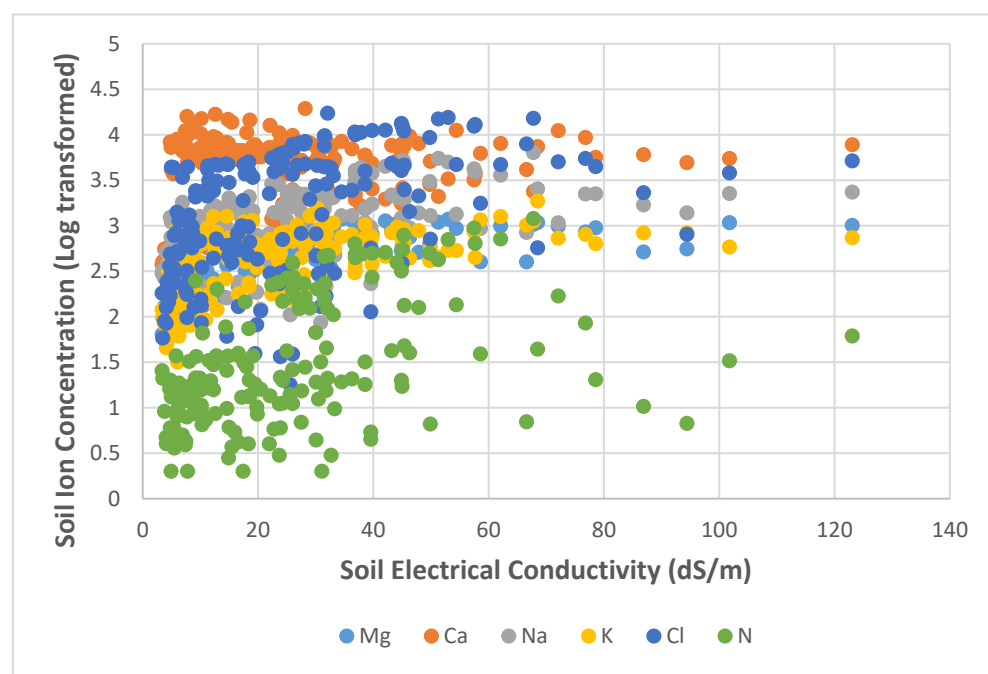

**Figure S3.** Electrical conductivity in comparison to ion concentration. In lower soil ECs, ions are clustered with calcium being most prevalent and nitrogen being least prevalent. The 4 largest soil ECs were collected from the same plant at the same time. Ion concentration was log transformed.

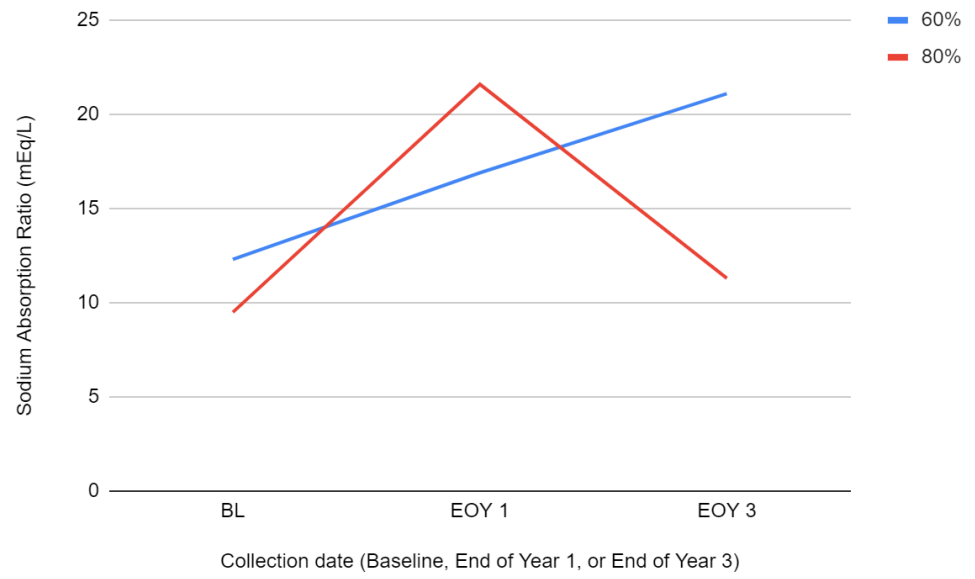

**Figure S4.** Irrigation treatment values for SAR over the duration of the study.
