# Supplementary material for: The Effects of Brackish Irrigation on Soil Ion Accumulation and Growth of Atriplex Species
Source: MDPI journal article supplement (doi:10.3390/soilsystems7040084), 2023-10-09
Supplement: s1 [file s1]

Archive with 1 entries (1 files):
- soilsystems-2522054-supplementary.pdf
